# Supplementary material
Source: PubMed Central journal article supplement (PMC5779633)
Supplement: NIHMS912608-supplement.pdf [file NIHMS912608-supplement.pdf]

## Appendix A

### *A1. Summary of models and their parameters*

**Table A1.** Computational model summaries. All doses are in EQD2.

| <b>Model<br/>(No. of patients)</b>                                                                                       | <b>Cross-<br/>reference</b> | <b>Parameters (95% CI)</b>                                                                                                                                                                                |
|--------------------------------------------------------------------------------------------------------------------------|-----------------------------|-----------------------------------------------------------------------------------------------------------------------------------------------------------------------------------------------------------|
| <i>Dose conversion to EQD2</i><br><br><i>(LQL)</i><br><br><i>(n=192)</i>                                                 | Ref. 4                      | $\alpha/\beta = 2.5 \text{ Gy}$<br><br>DT = 5.0 Gy<br><br>$\gamma/\alpha = 5.0 \text{ Gy}$                                                                                                                |
| <i>Perfusion Reduction</i><br><br><i>HCC</i><br><br><i>(n=23)</i>                                                        | Fig. 2                      | D50=23.5 (10.8-36.2); $k=0.268$ (0.207-0.329)                                                                                                                                                             |
| <i>Dosimetric LKB</i><br><br><i>ALBI</i><br><br><i>C-P</i><br><br><i>Enzymatic changes</i><br><br><i>(n=176)*</i>        | Fig. 1                      | D50=24.3 (22.0-26.5); $\gamma_{50}=0.466$ (0.195-0.737)<br><br>D50=29.1 (26.5-31.7); $\gamma_{50}=0.494$ (0.217-0.772)<br><br>D50=52.6 (50.4-54.7); $\gamma_{50}=1.29$ (0.963-1.62)                       |
| <i>Dosimetric+imaging PA</i><br><br><i>ALBI</i><br><br><i>C-P</i><br><br><i>Enzymatic changes</i><br><br><i>(n=176)*</i> | Fig. 3                      | $f_{50}=0.515$ (0.459-0.571); $\gamma_{50}=1.05$ (0.0564-2.05)<br><br>$f_{50}=0.559$ (0.502-0.616); $\gamma_{50}=1.08$ (0.0114-2.14)<br><br>$f_{50}=0.920$ (0.804-1.04); $\gamma_{50}=1.52$ (0.0924-2.94) |

|                                                                                                                                            |               |                                                                                                                                                                                                                                            |
|--------------------------------------------------------------------------------------------------------------------------------------------|---------------|--------------------------------------------------------------------------------------------------------------------------------------------------------------------------------------------------------------------------------------------|
| <p><i>Dose+biomarkers LKB</i></p> <p><i>(ALBI)</i></p> <p><i>change in TGF-β1</i></p> <p><i>change in Eotaxin</i></p> <p><i>(n=72)</i></p> | <p>Fig. 4</p> | <p>D50=16.3 (-17.3-49.9); <math>\gamma_{50}</math>=0.408 (-0.565-1.38); <math>\delta</math>=0.0893 (-3.56-3.74)</p> <p>D50=15.2 (-9.16-39.6); <math>\gamma_{50}</math>=0.416 (-0.524-1.36); <math>\delta</math>=0.357 (-2.76-3.47)</p>     |
| <p><i>Dose+biomarkers PA</i></p> <p><i>(ALBI)</i></p> <p><i>change in TGF-β1</i></p> <p><i>change in Eotaxin</i></p> <p><i>(n=72)</i></p>  | <p>Fig. 5</p> | <p>f50=0.217 (-0.275-0.709); <math>\gamma_{50}</math>=0.651 (-0.998-2.30); <math>\delta</math>=0.959 (-2.00-3.92)</p> <p>f50=0.427 (0.133-0.722); <math>\gamma_{50}</math>=0.652 (-0.106-2.36); <math>\delta</math>=0.630 (-1.62-2.87)</p> |
| <p><i>Change in ICG</i></p> <p><i>LKB</i></p> <p><i>PA</i></p> <p><i>(n=102)</i></p>                                                       | <p>Fig. 6</p> | <p>D50=11.0 (-61.5-83.5); <math>\gamma_{50}</math>=0.434 (-0.590-1.46); <math>\delta</math>=0.937 (-8.29-10.2)</p> <p>f50=0.482 (-0.984-1.95); <math>\gamma_{50}</math>=0.744 (-2.46-3.95); <math>\delta</math>=0.148 (-3.07-3.37)</p>     |

\*Patients with terminal baseline toxicity were excluded.

A2. Sample implementation and comparison with known limits.

**Table A2.1.** LKB estimates of risk (Figure 1 model). Note the impact of the selected endpoint on estimated risk, which should be taken into consideration when applying these values for what would be considered as “safe dose.”

| Dose-<br>volume<br>limits | EQD2<br>Conversion* | Estimated Risk |          |         |                          |
|---------------------------|---------------------|----------------|----------|---------|--------------------------|
|                           |                     | RILD (%)**     | ALBI (%) | C-P (%) | Enzymatic<br>changes (%) |
| <i>MLD in 3 fx</i>        |                     |                |          |         |                          |
| 13                        | 19.74               | 0.01           | 40.77    | 34.06   | 2.08                     |
| 15                        | 25.00               | 0.72           | 51.34    | 43.08   | 4.49                     |
| 18                        | 33.33               | 31.33          | 66.79    | 57.15   | 11.81                    |
| 20                        | 38.89               | 79.43          | 75.83    | 66.15   | 19.96                    |
| <i>MLD in 5 fx</i>        |                     |                |          |         |                          |
| 13                        | 14.73               | 0.00           | 32.28    | 27.05   | 1.00                     |
| 15                        | 18.33               | 0.00           | 38.71    | 32.34   | 1.76                     |
| 18                        | 24.40               | 0.48           | 50.19    | 42.07   | 4.15                     |
| 20                        | 28.89               | 6.27           | 58.73    | 49.64   | 7.25                     |

\*These estimates are approximate only due to nonlinearity in EQD2 conversion from 3D distributions into dose-volume histograms (assume a uniform distribution in the uninvolved liver).

\*\*QUANTEC HCC liver model (Figure 2, Ref. 31).

**Table A2.2** PA estimates of risk (Figures 2/3 model). Note the impact of the selected endpoint on estimated risk, which should be taken into consideration when applying these values for what would be considered as “safe dose.”

| Dose-volume limits | EQD2 Conversion* | Perfusion reduction (Figure 2) | Estimated Risk |          |         |                       |
|--------------------|------------------|--------------------------------|----------------|----------|---------|-----------------------|
|                    |                  |                                | RILD (%)**     | ALBI (%) | C-P (%) | Enzymatic changes (%) |
| <i>MLD in 3 fx</i> |                  |                                |                |          |         |                       |
| 13                 | 19.74            | 0.49                           | 0.00           | 44.37    | 36.42   | 3.66                  |
| 15                 | 25.00            | 0.50                           | 0.00           | 47.79    | 39.53   | 4.25                  |
| 18                 | 33.33            | 0.52                           | 1.16           | 51.71    | 43.16   | 5.02                  |
| 20                 | 38.89            | 0.53                           | 22.12          | 53.81    | 45.12   | 5.48                  |
| <i>MLD in 5 fx</i> |                  |                                |                |          |         |                       |
| 13                 | 14.73            | 0.47                           | 0.00           | 40.66    | 33.10   | 3.08                  |
| 15                 | 18.33            | 0.48                           | 0.00           | 43.58    | 35.71   | 3.53                  |
| 18                 | 24.40            | 0.50                           | 0.04           | 47.46    | 39.22   | 4.19                  |
| 20                 | 28.89            | 0.51                           | 0.17           | 49.76    | 41.34   | 4.63                  |

\*These estimates are approximate only due to nonlinearity in EQD2 conversion from 3D distributions into dose-volume histograms (assume a uniform distribution in the uninvolved liver).

\*\*Estimated based on PA model from Ref. 22.
